# Supplementary material for: Tripodal imidazole frameworks: Reversible vapour sorption both with and without significant structural changes
Source: Royal Society of Chemistry journal article supplement (doi:10.1039/c0dt01011a), 2010-11-30
Supplement: c0dt01011a.pdf [file c0dt01011a.pdf]

# Tripodal Imidazole Frameworks: Reversible Vapour Sorption Both With and Without Significant Structural Changes<sup>†</sup>

Charlotte E. Willans,<sup>a</sup> Sara French,<sup>a</sup> Leonard J. Barbour,<sup>b</sup> Jan-André Gertenbach,<sup>b</sup> Peter C. Junk,<sup>c</sup> Gareth O. Lloyd<sup>a</sup> Robert J. Dyer<sup>a</sup> and Jonathan W. Steed<sup>a\*</sup>

## Supplementary information

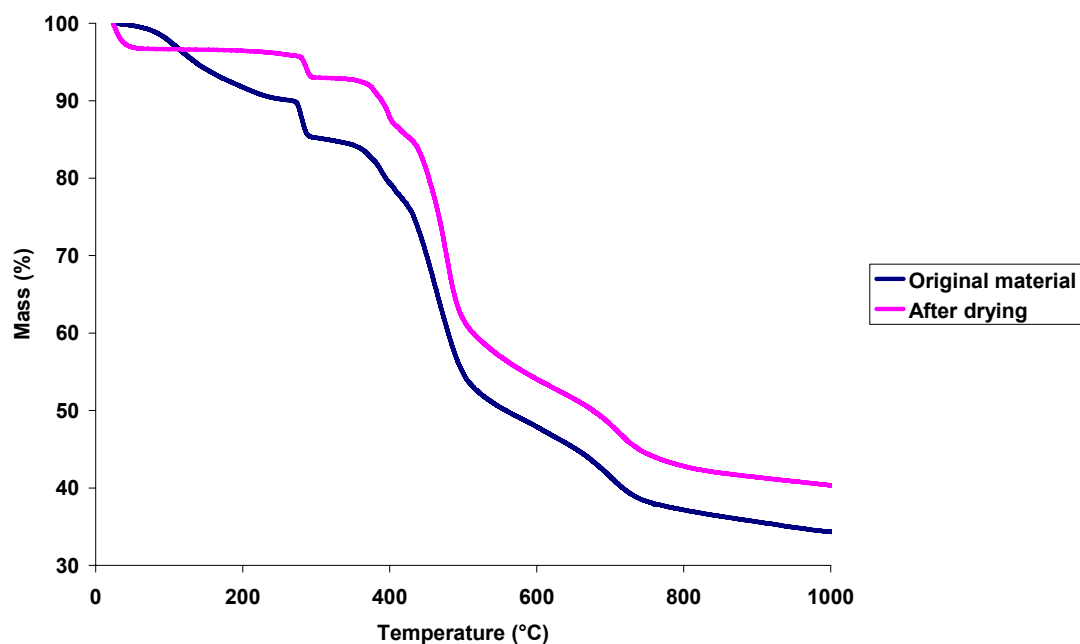

Figure S1: TGA curves for TIF-1 as synthesised and after heating at 200°C.

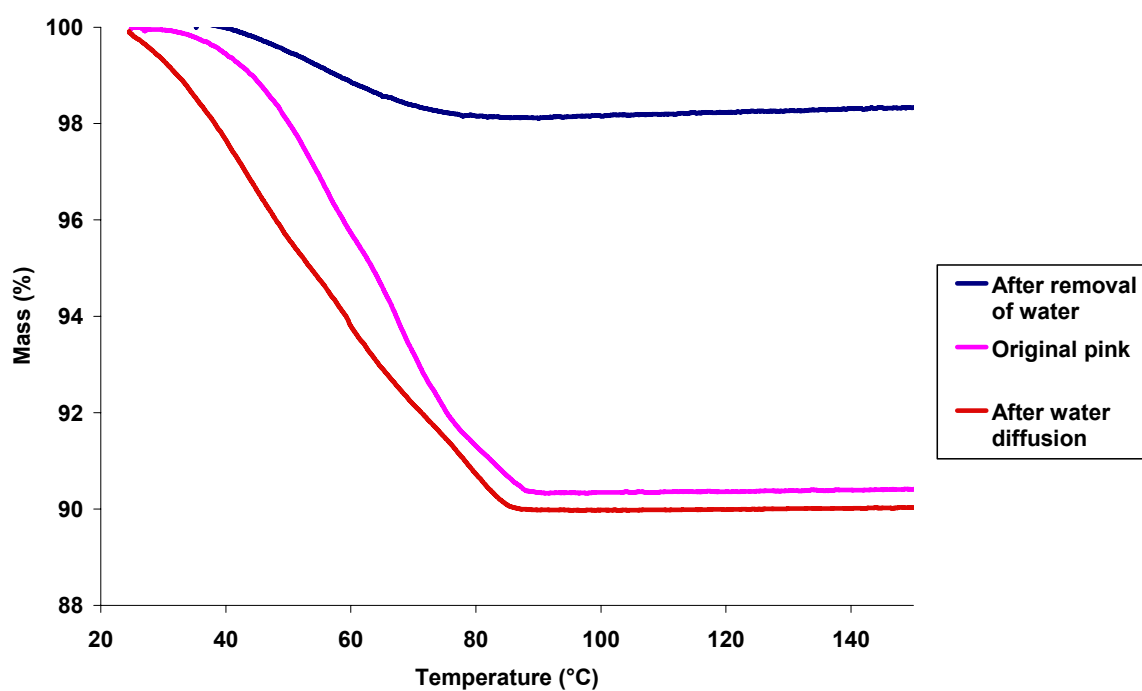

Figure S2: TGA curves for TIF-2.

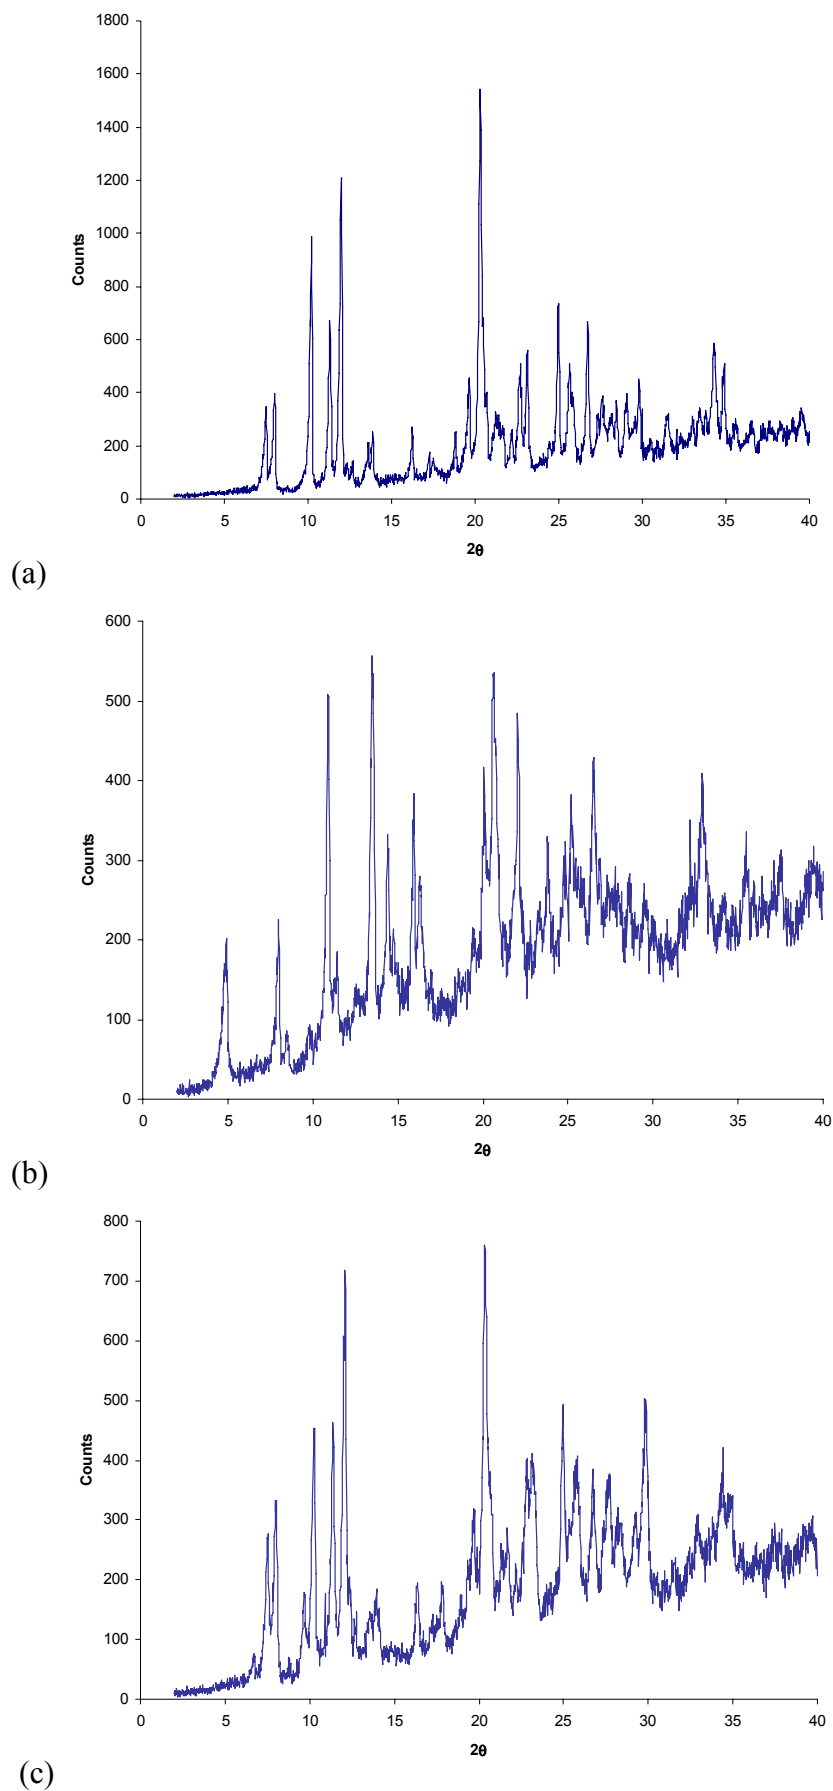

**Figure S3:** XRPD Data for TIF-2 (a) as synthesized (pink) (b) after drying (blue) (c) after exposure of dried material to water (pink)

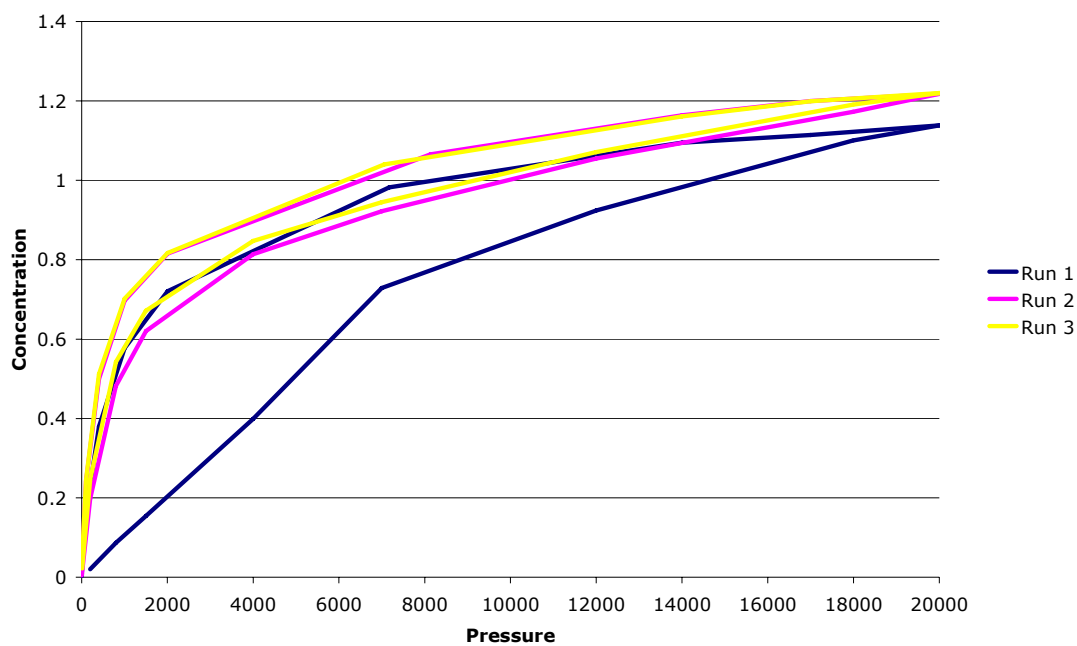

**Figure S4:** Multiple cycles of CO<sub>2</sub> sorption and desorption of TIF-2' at 22 °C.

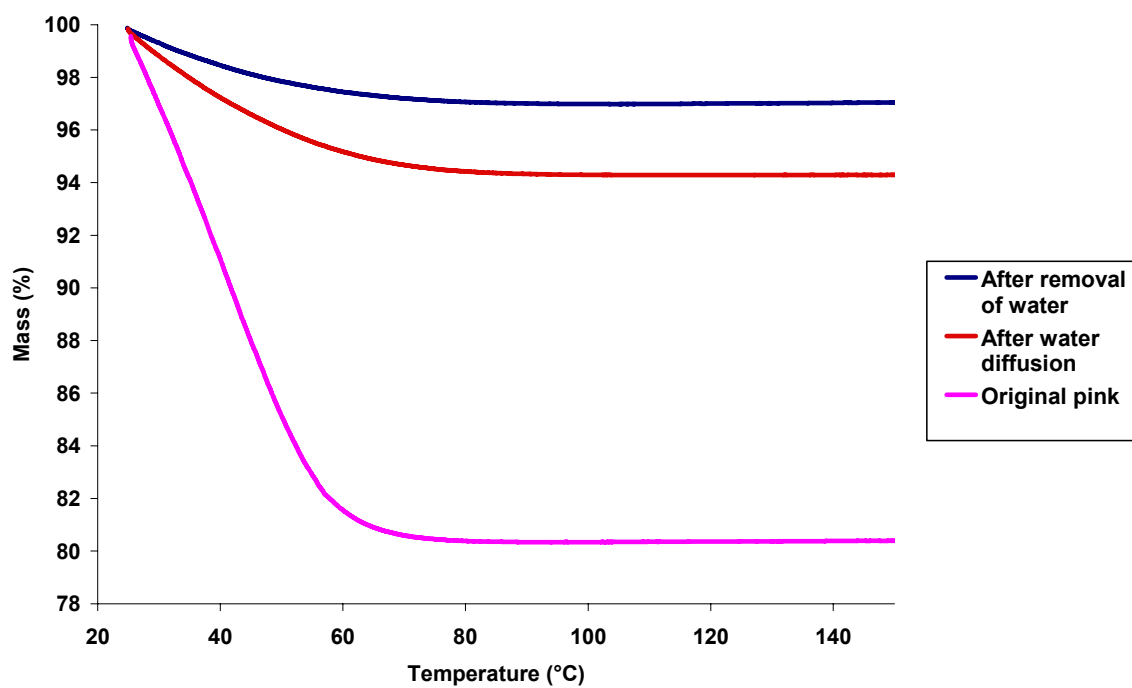

**Figure S5:** TGA data for TIF-3

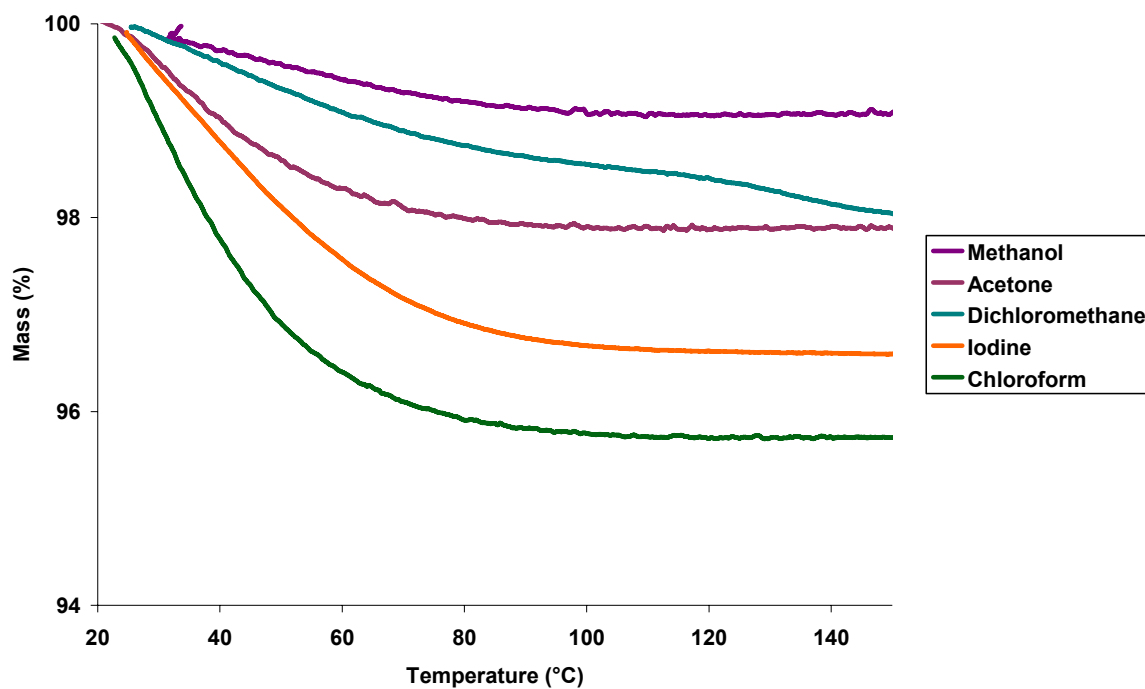

**Figure S6:** TGA curves for **TIF-3** after exposure to different vapours.

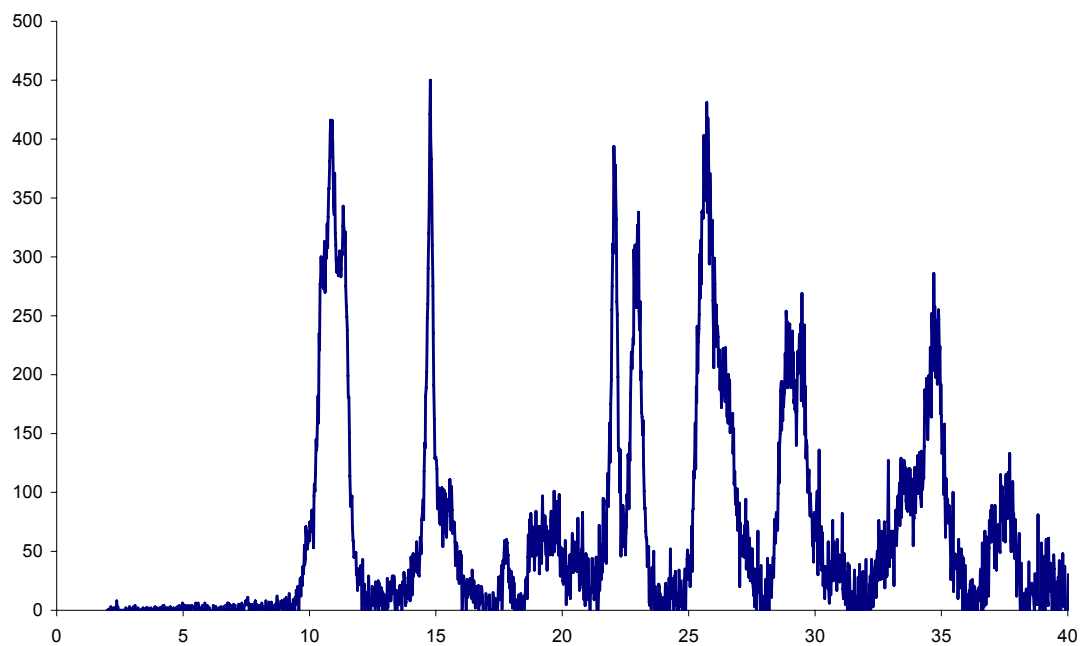

**Figure S7:** X-ray diffraction powder pattern of dehydrated **TIF-3** after water vapour diffusion.

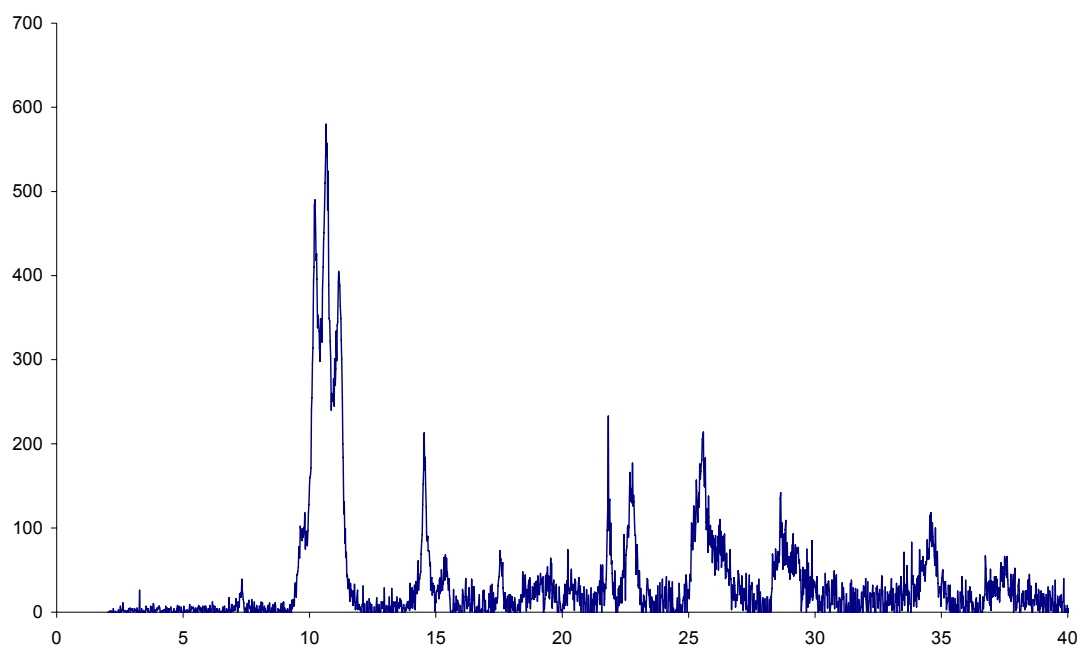

**Figure S8:** X-ray diffraction powder pattern of dehydrated **TIF-3** after D<sub>2</sub>O vapour diffusion.

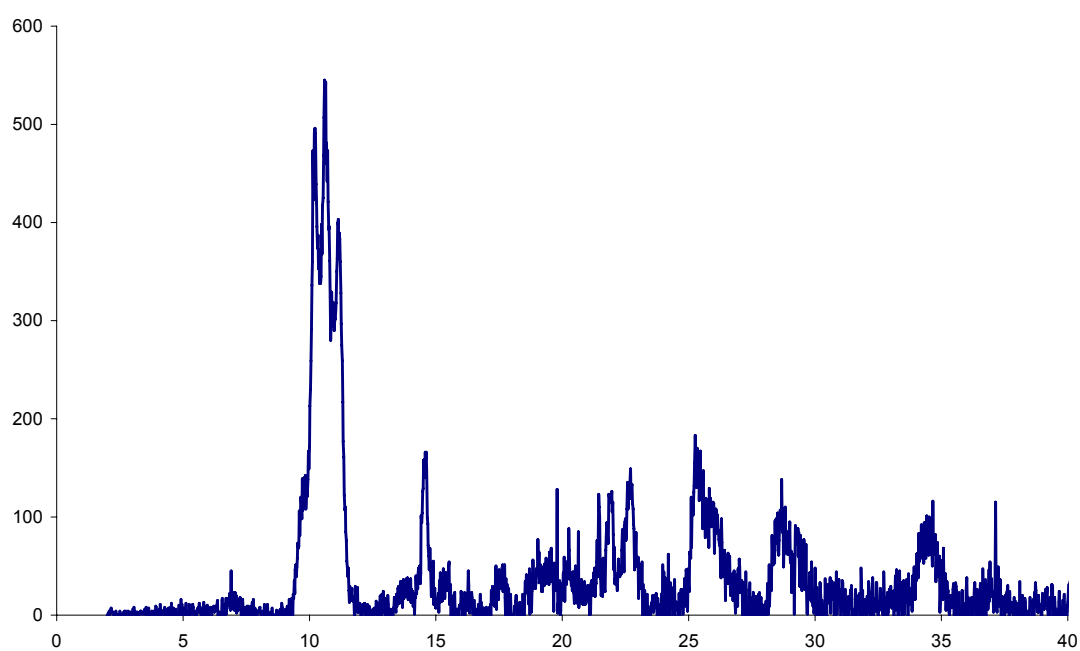

**Figure S9:** X-ray diffraction powder pattern of dehydrated **TIF-3** after MeOH vapour diffusion.

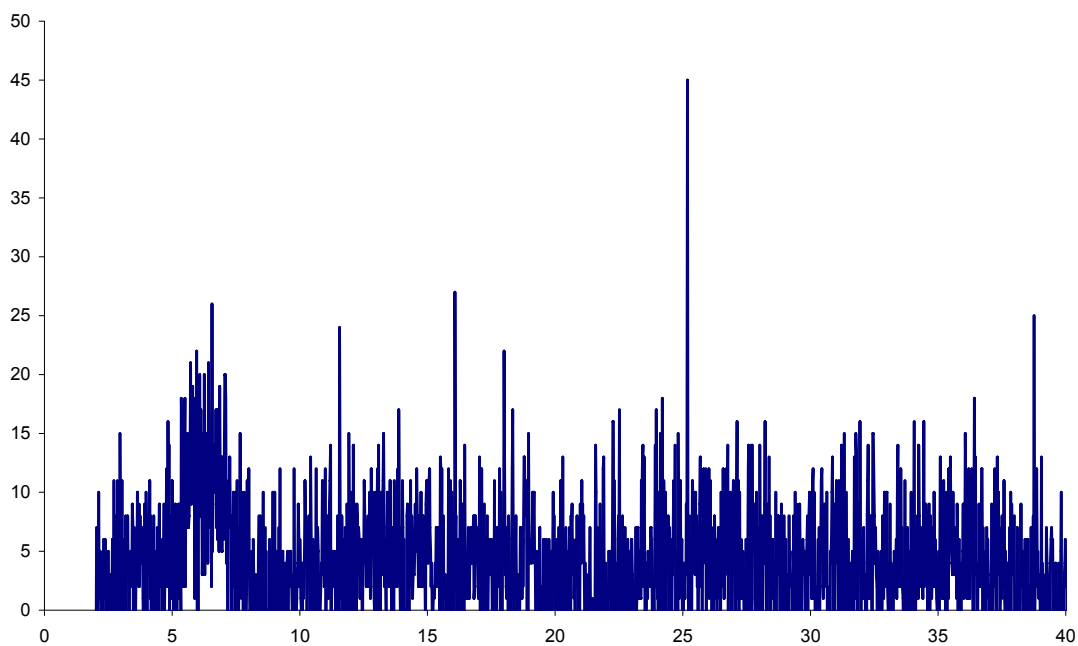

**Figure S10:** X-ray diffraction powder pattern of dehydrated **TIF-3** after DCM vapour diffusion.

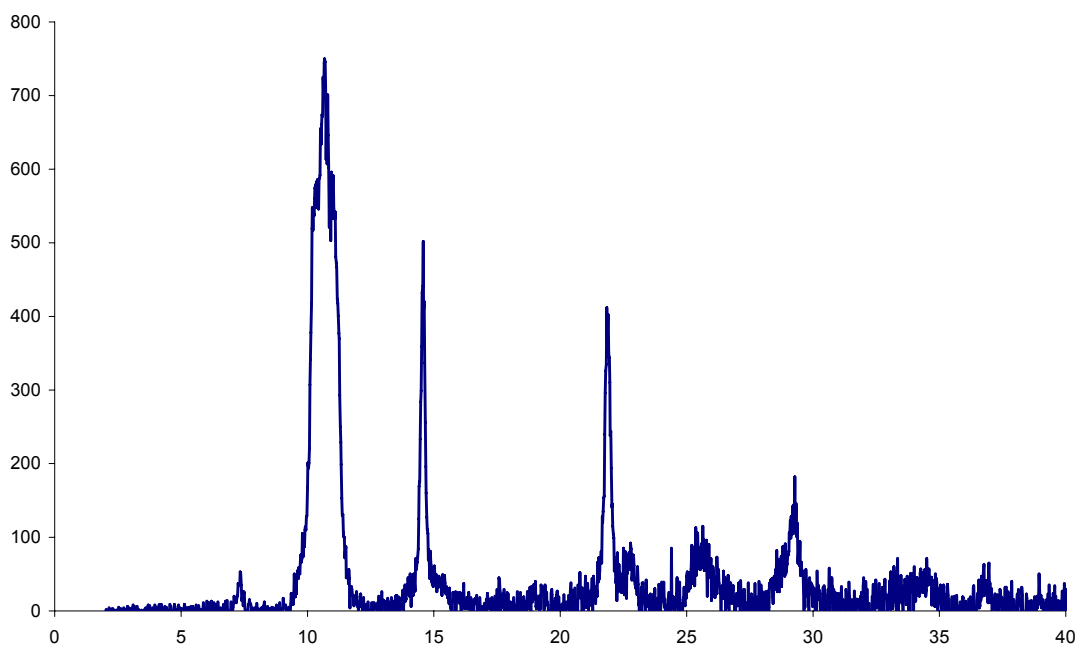

**Figure S11:** X-ray diffraction powder pattern of dehydrated **TIF-3** after Iodine vapour diffusion.

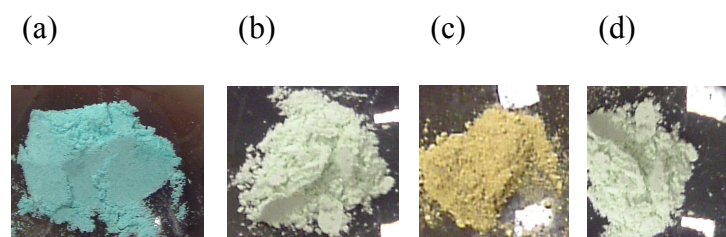

**Figure S12:** solid-state mechanochemical reaction of ligand **1** with copper(II) chloride (a) starting material  $\text{CuCl}_2 \cdot 2\text{H}_2\text{O}$ , (b) product from grinding  $\text{CuCl}_2 \cdot 2\text{H}_2\text{O}$  with **1**, (c) sample in 'b' after drying in an oven at  $80\text{ }^\circ\text{C}$ , (d) material formed from sample shown in 'c' by slow diffusion of water vapour.

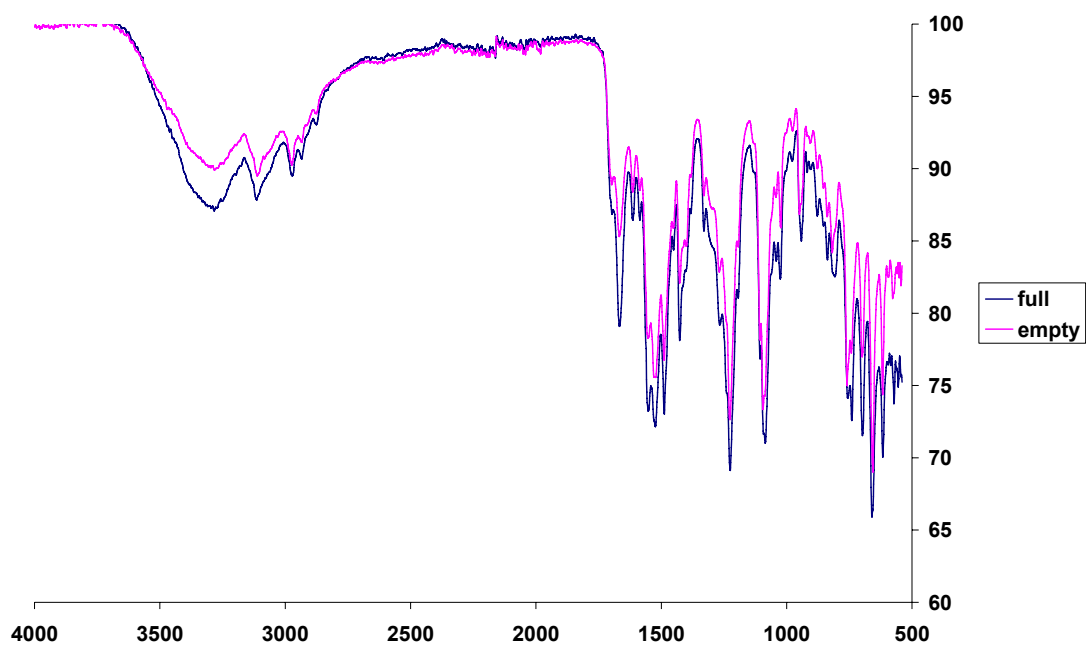

**Figure S13: IR spectra of TIF 1.**

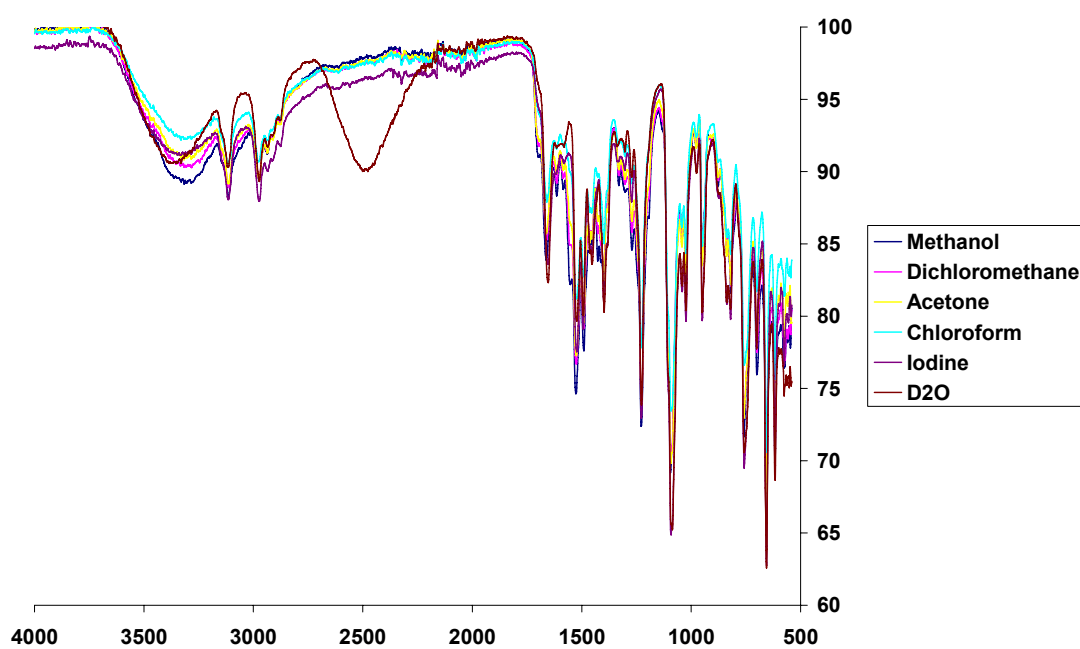

**Figure S14: IR spectra of TIF 1 following vapour diffusion.**



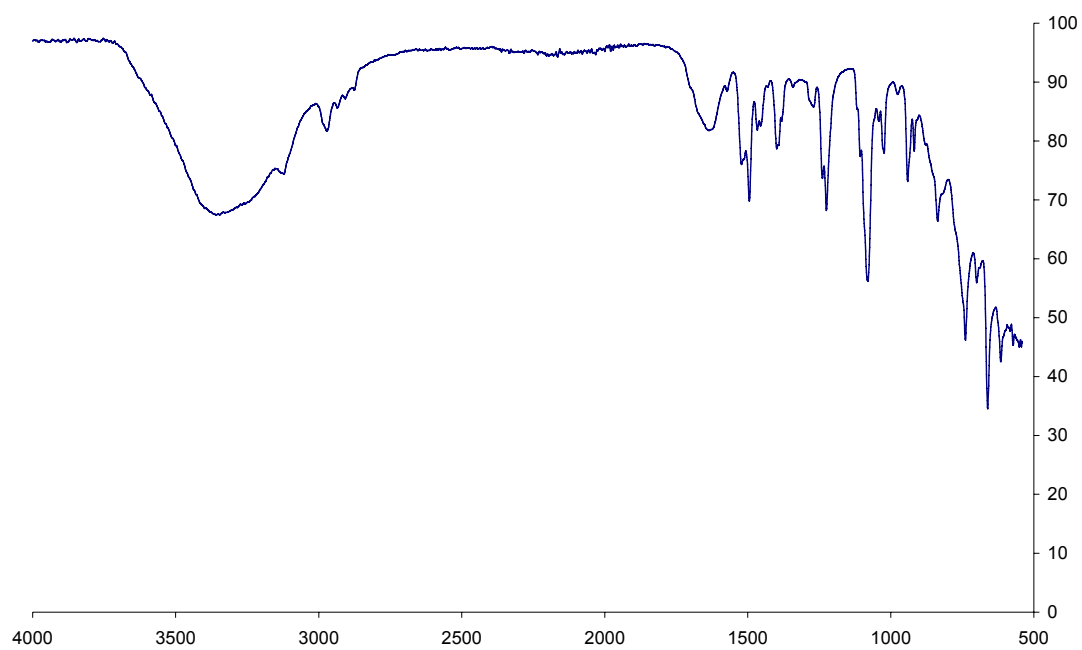

**Figure S15: IR spectrum of TIF 2.**

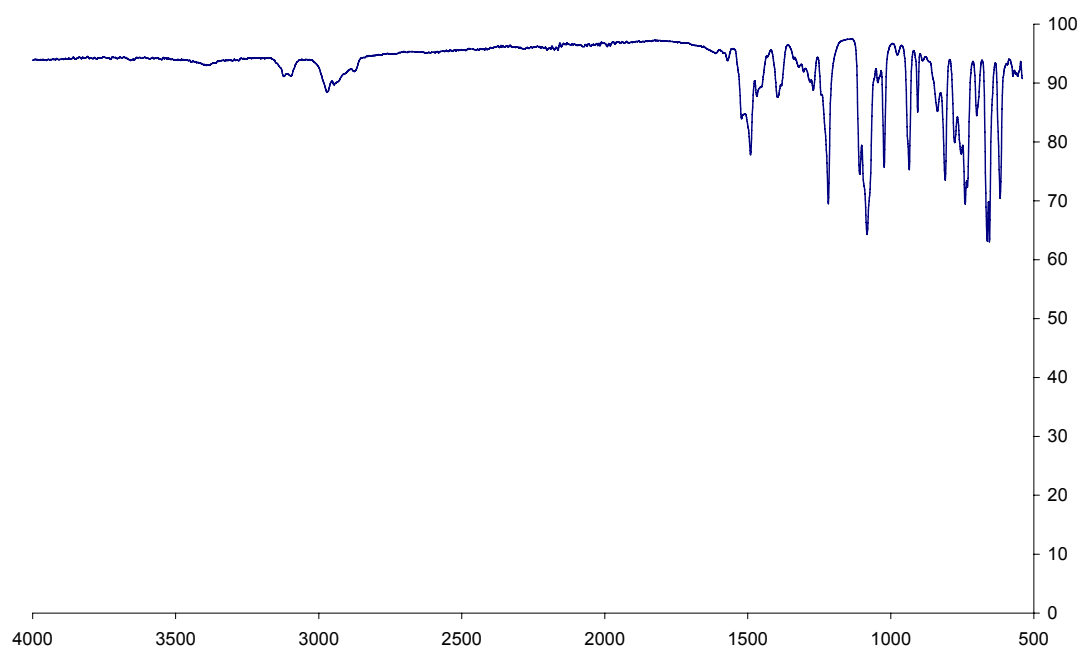

**Figure S16: IR spectrum of TIF 2 after heating at 80 °C under vacuum.**

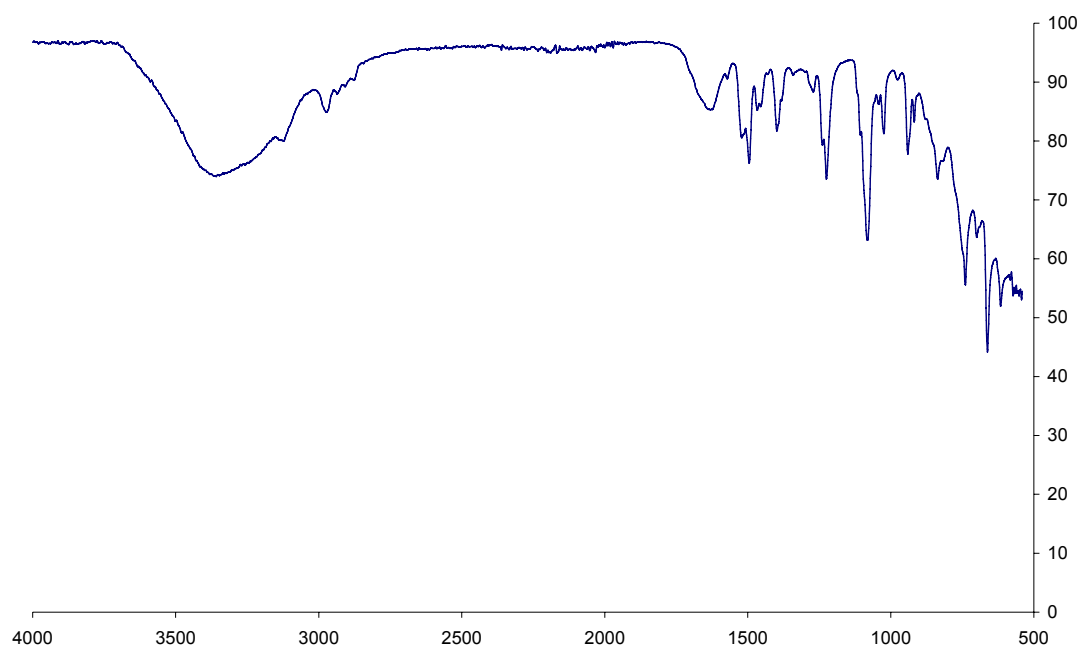

**Figure S17: IR spectrum of TIF 2 after water vapour diffusion.**

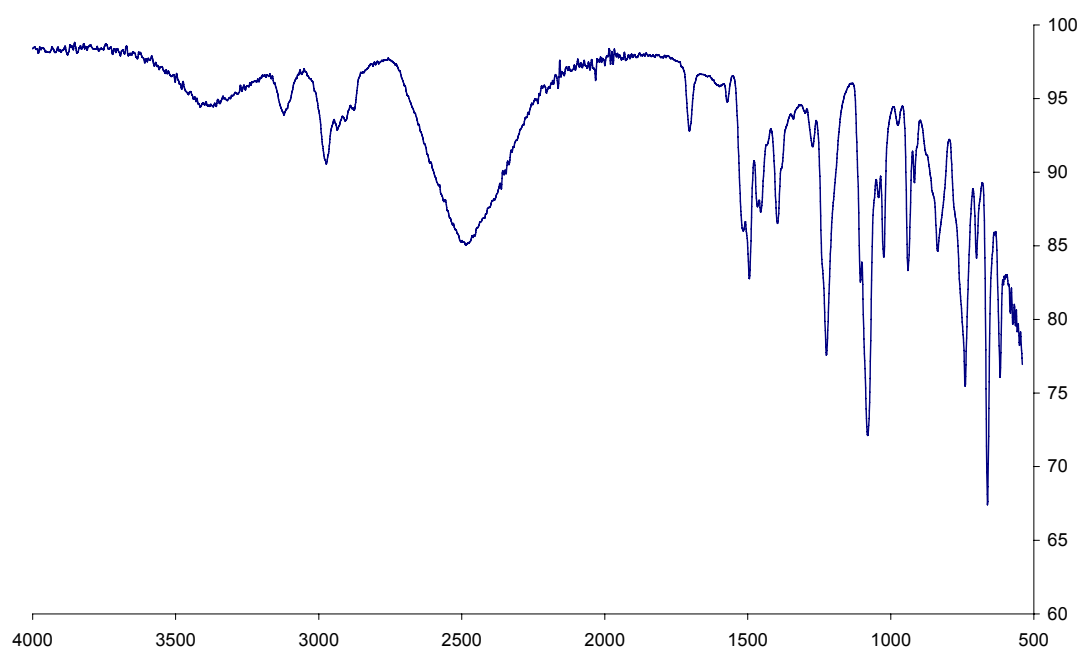

**Figure S18: IR spectrum of TIF 2 after D<sub>2</sub>O vapour diffusion.**

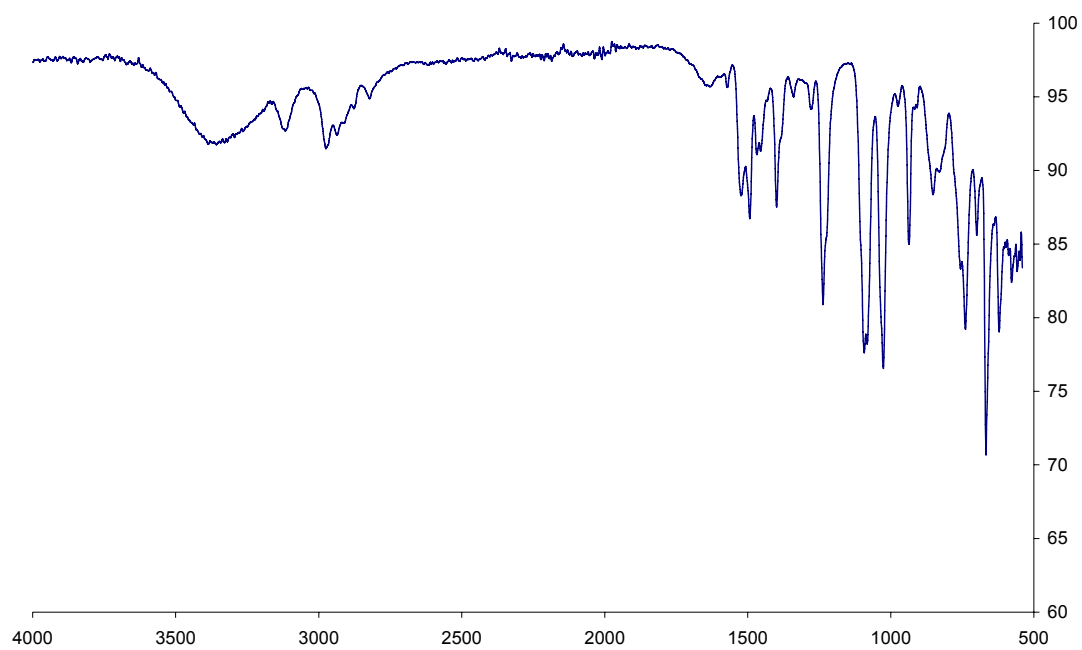

**Figure S19: IR spectrum of TIF 2 after MeOH vapour diffusion.**

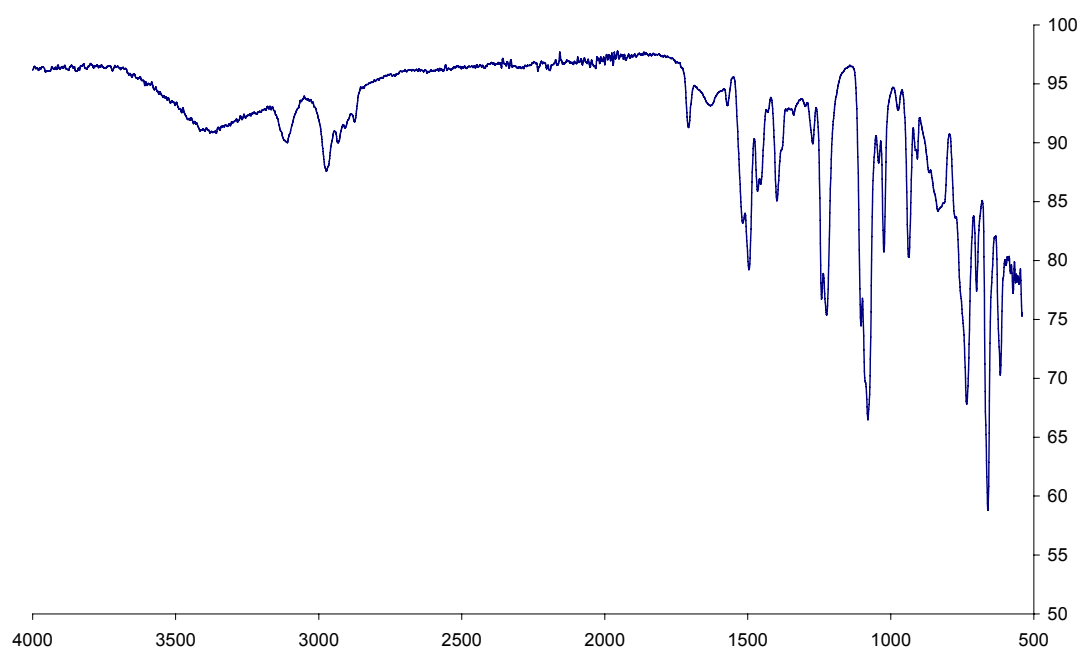

**Figure S20: IR spectrum of TIF 2 after DCM vapour diffusion.**

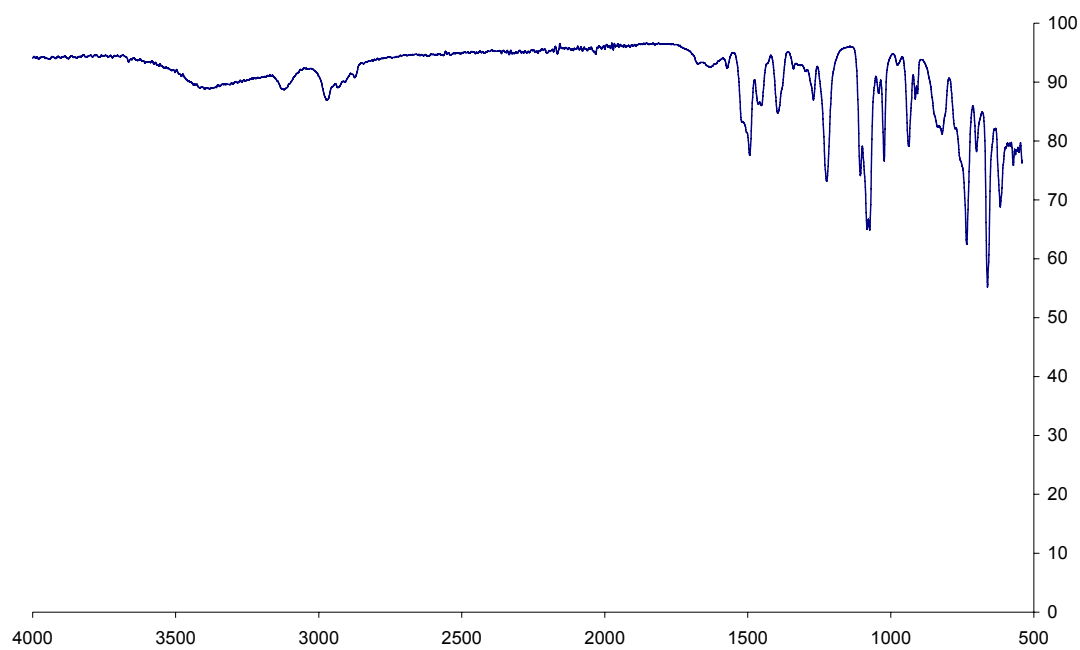

**Figure S21: IR spectrum of TIF 2 after CHCl<sub>3</sub> vapour diffusion.**

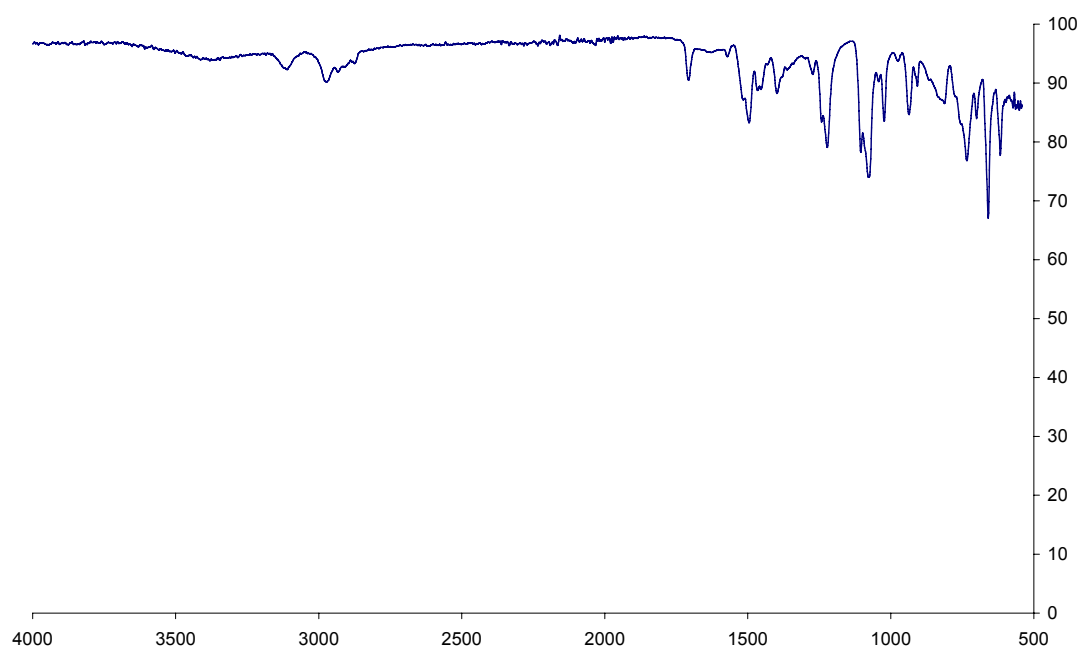

**Figure S22: IR spectrum of TIF 2 after acetone vapour diffusion.**

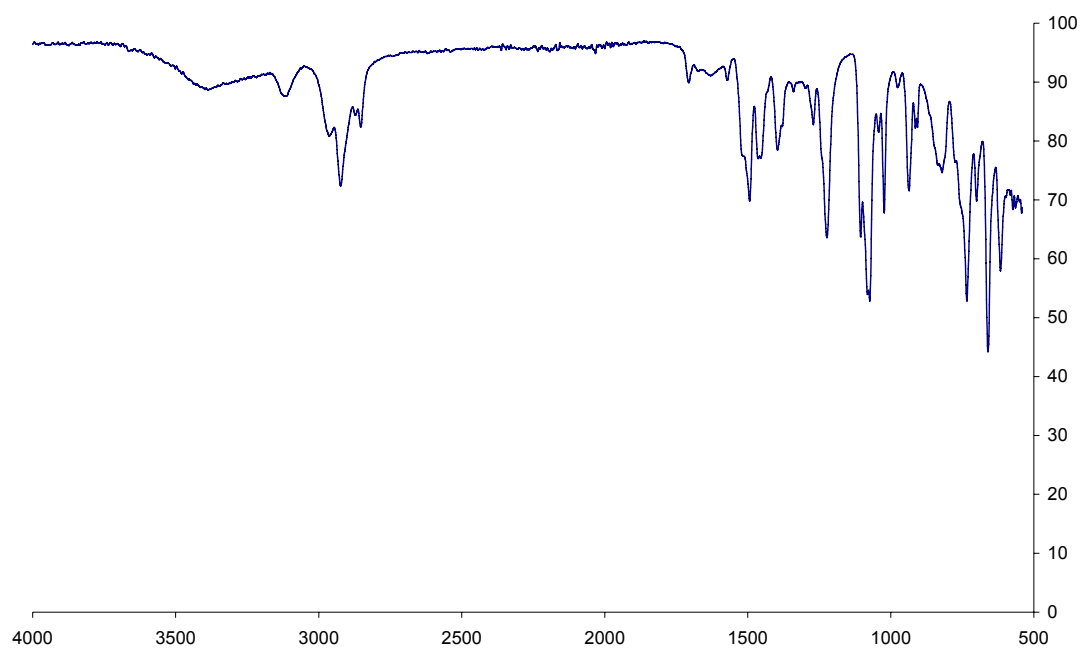

**Figure S23: IR spectrum of TIF 2 after iodine vapour diffusion.**

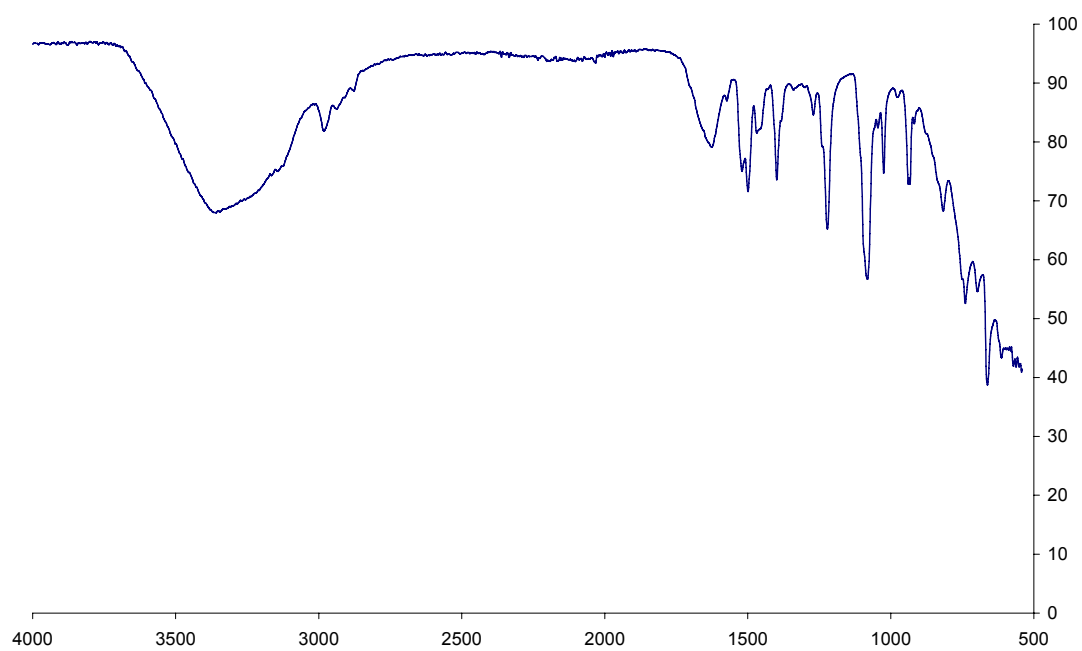

**Figure S24: IR spectrum of TIF 3.**

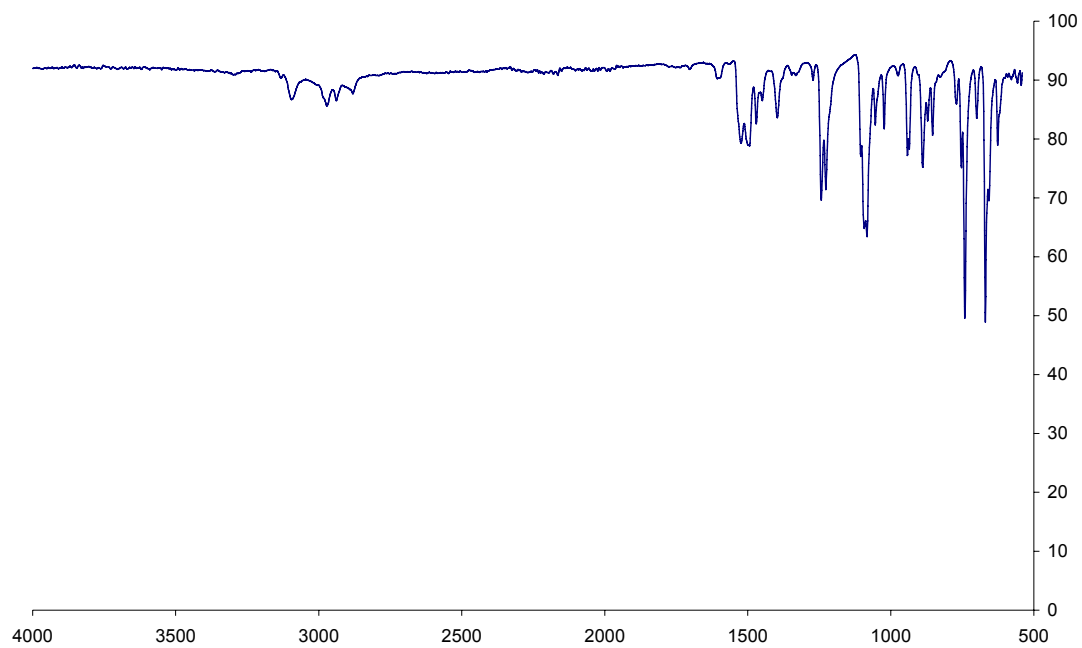

**Figure S25: IR spectrum of TIF 3 after heating at 80 °C under vacuum.**

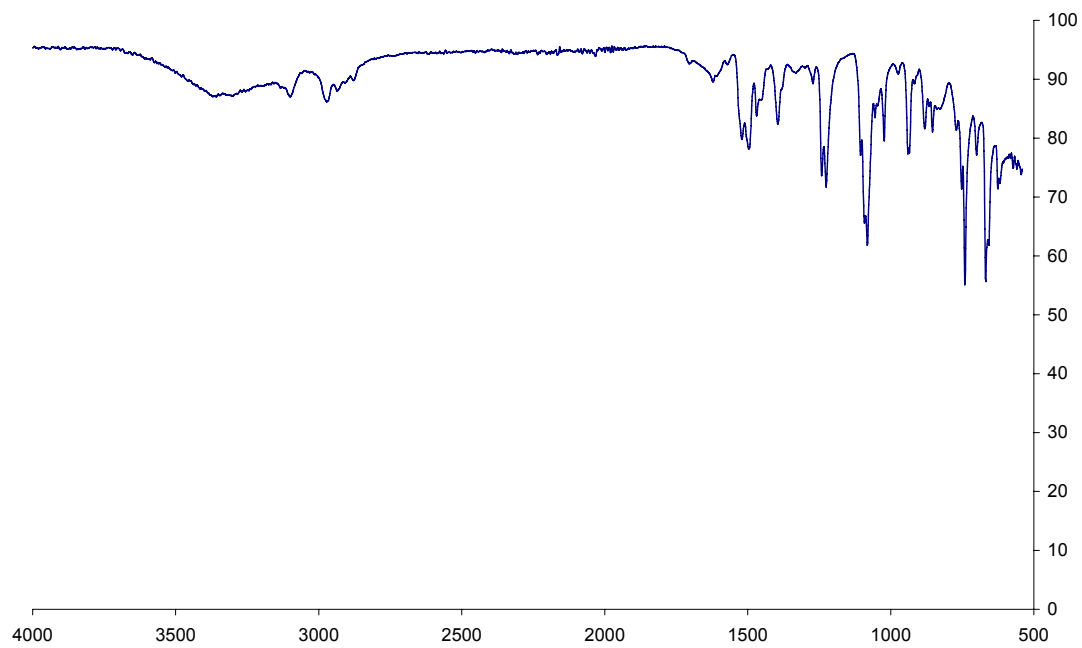

**Figure S26: IR spectrum of TIF 3 after water vapour diffusion.**

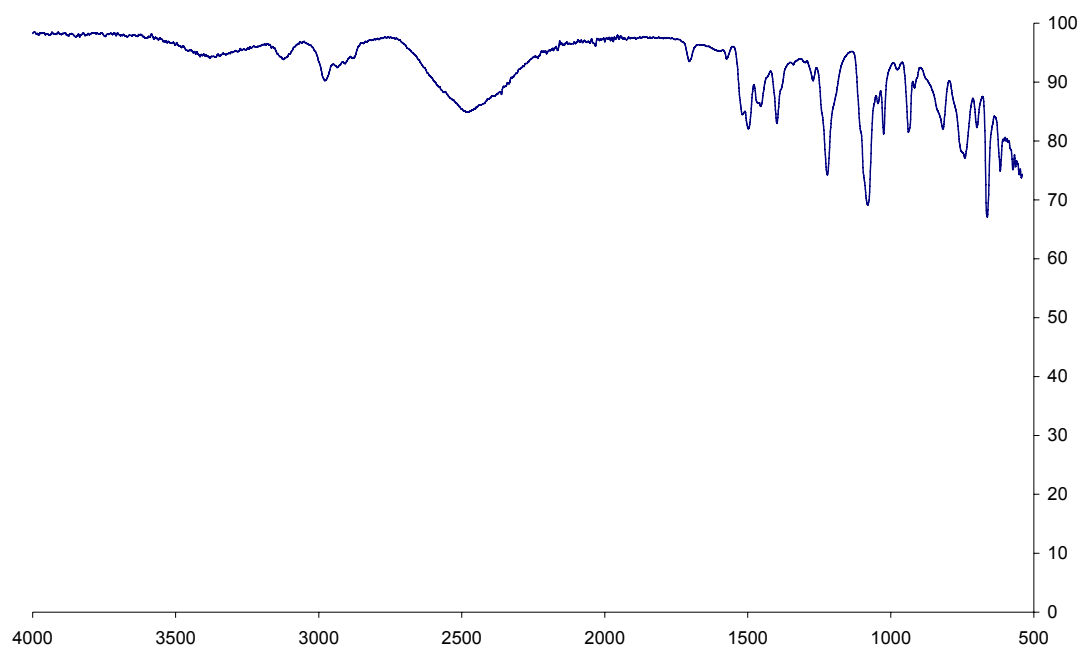

**Figure S27: IR spectrum of TIF 2 after D<sub>2</sub>O vapour diffusion.**

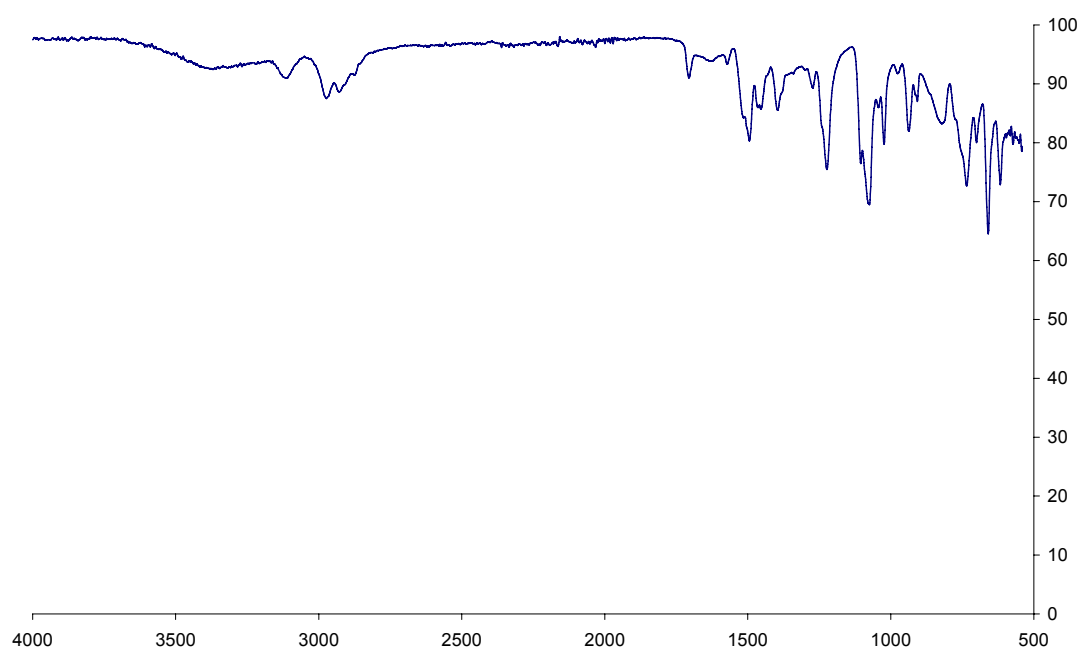

**Figure S28: IR spectrum of TIF 2 after MeOH vapour diffusion.**

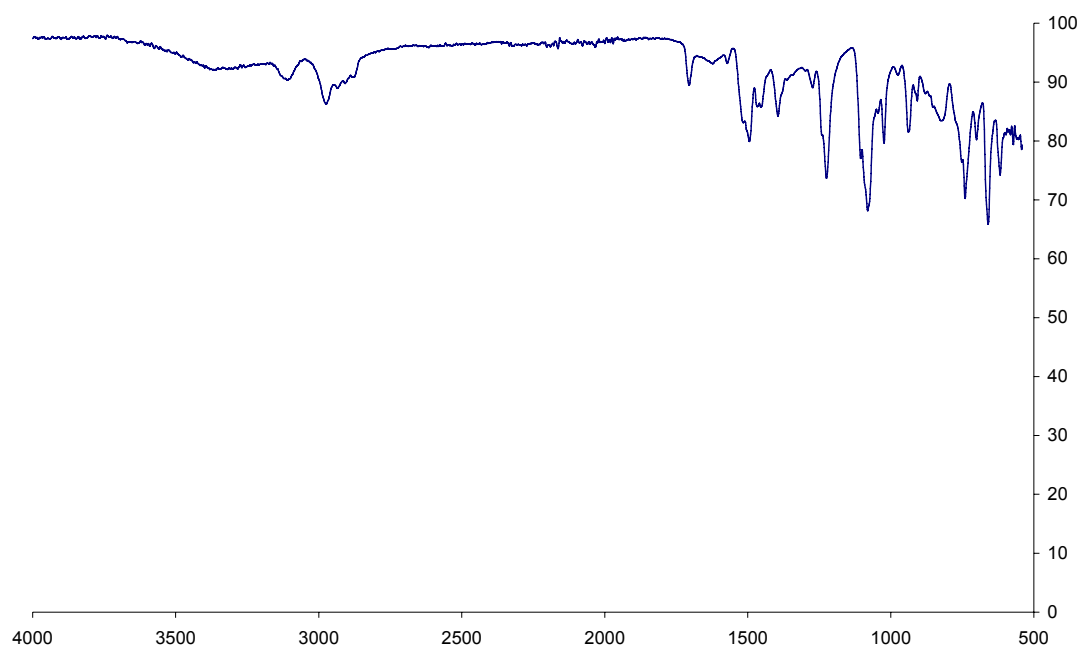

**Figure S29: IR spectrum of TIF 2 after DCM vapour diffusion.**

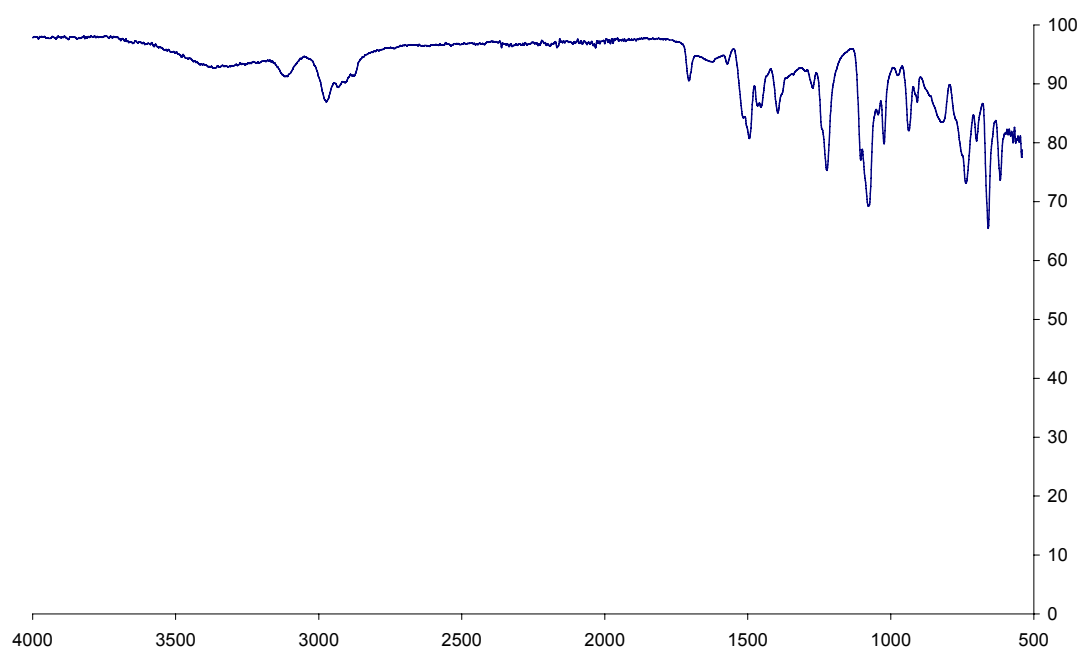

**Figure S30: IR spectrum of TIF 2 after CHCl<sub>3</sub> vapour diffusion.**



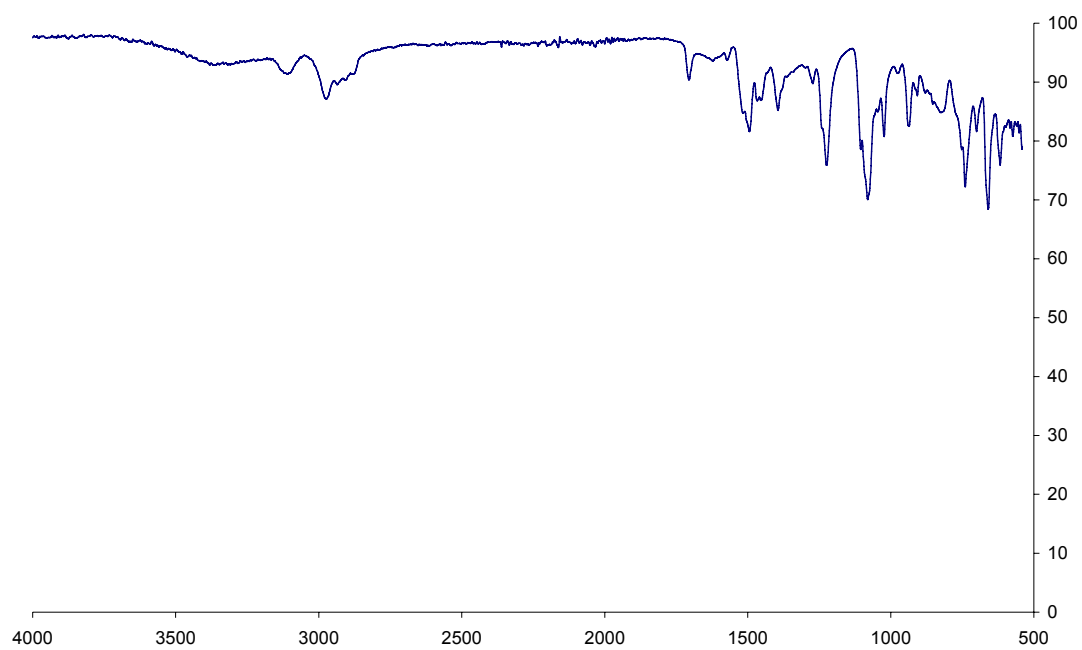

**Figure S31: IR spectrum of TIF 2 after acetone vapour diffusion.**

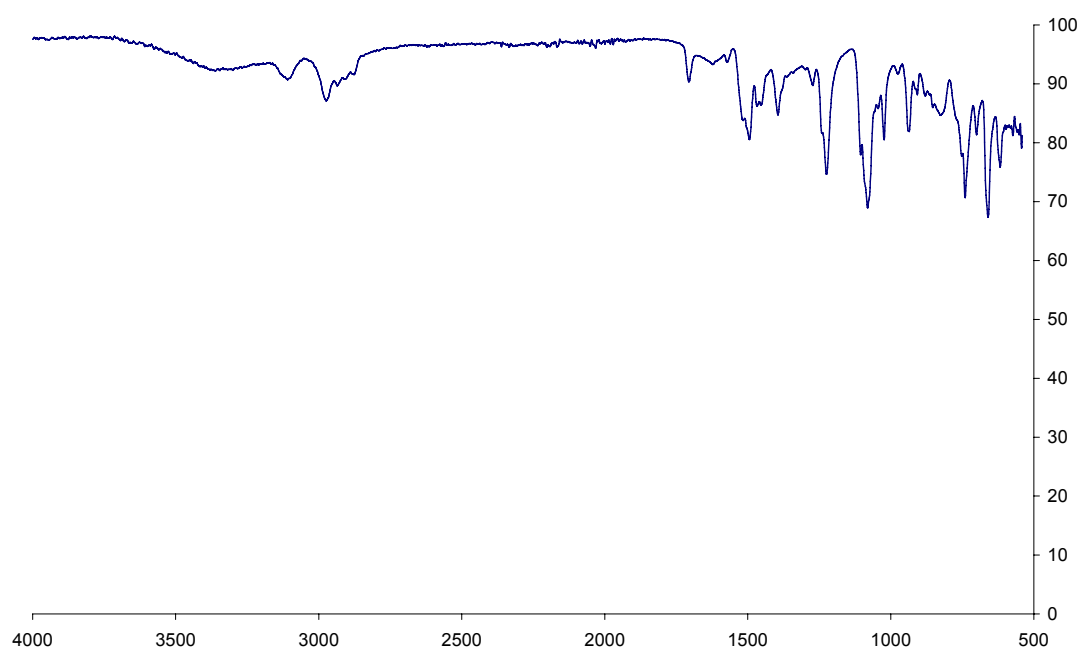

**Figure S32: IR spectrum of TIF 2 after iodine vapour diffusion.**
